# Supplementary material for: DIlp7-Producing Neurons Regulate Insulin-Producing Cells in Drosophila
Source: Front Physiol. 2021 Jul 27;12:630390. doi: 10.3389/fphys.2021.630390 (PMC8353279; doi:10.3389/fphys.2021.630390)
Supplement: Supplementary file 4 [file Data_Sheet_1.xlsx]

## Sheet: Recipes
Normal Food (adapted from Indian Edu) (1L)	Quantity	kcal	protein (kcal)	carbohydrates (kcal)	lipid (kcal)		P Protein
Sucrose (g)	22	88	0	88	0		C Carbohydrate
Malt extract (g)	20	73.4	4.8	76.96	0		Li Lipid
Yeast (g)	18	72.36	32.4	25.2	9.72
Soy pepton (g)	10	36.6	17	1.24	18.45
Yellow cornmeal (g)	80	276.8	25.6	224	21.6
Glucose (g)	20	77.4	0	76.16	0
Agar (g)	7	1.82	0.14	1.96	0
Water (mL)	fill until 1L
0.1g/mL Nipagin/EtOH (mL)	40	Add at 60°C
	kcal/L	626.38	79.94	493.52	49.77
	%		0.127622	0.787892	0.0794566
				P:C:Li ratio	2:10:1
				P:C ratio	1:6
Yeast Food (YF) (1L)	Quantity	kcal	protein (kcal)	carbohydrates (kcal)	lipids (kcal)
Yeast extract (g)	20	43.4	23.84	18.72	0.9
Soy pepton (g)	20	73.2	34	2.48	36.9
Sucrose (g)	30	120	0	120	0
Glucose (g)	60	232.2	0	228.48	0
Yeast (g)	80	321.6	144	112	43.2
Agar (g)	10	2.6	0.2	2.8	0
Water (mL)	fill until 1L
0.1g/mL Nipagin/EtOH (mL)	40	Add at 60°C
	kcal	793	202.04	484.48	81
	%		0.254779	0.610946	0.102144
				P:C:Li ratio	3:6:1
				P:C ratio	1:2
Corn Food (CF) (1L)	Quantity	kcal	protein (kcal)	carbohydrates (kcal)	lipid (kcal)
Glucose (g)	30	116.1	0	114.24	0
Sorbitol (g)	18	43.2	0	43.2	0
Arabinose (g)	15	0	0	0	0
Yellow cornmeal (g)	65	224.9	20.8	182	17.55
Fructose (g)	20	80	0	79.2	0
Malt extract (g)	15	55.05	3.6	57.72	0
Soy pepton (g)	70	256.2	119	8.68	129.15
Sucrose (g)	15	60	0	60	0
Agar (g)	8	2.08	0.16	2.24	0
Water (mL)	fill until 1L
0.1g/mL Nipagin/EtOH (mL)	40	Add at 60°C
	kcal	837.53	143.56	547.28	146.7
	%		0.171409	0.653445	0.175158
				P:C:Li ratio	1:4:1
				P:C ratio	1:4
Lipid-reduced food (LR-YF) (1L)	Quantity	kcal	protein (kcal)	sugar (kcal)	lipids (kcal)
Yeast Autolysate (g)	100	217	119.2	93.6	4.5
20% Glucose (mL)	500	387	0	380.8	0
Agar (g)	10	2.6	0.2	2.8	0
qsp H20 (mL)	fill until 1L
	kcal	606.6	119.4	477.2	4.5
	%		0.196835	0.78668	0.0074184
				P:C:Li ratio	20:80:1
				P:C ratio	1:4

## Sheet: Explanation survival sheets
Survival sheets	Explanation
Columns A-G	Detailed single experiments
Experiment number			Survivors (S)	Dead (D)	Total	Percentage of survivors (%S)
(Date of experiment)	Control	Genotype	Number of pupae	Number of dead larvae	Total number of larvae tracked	S/Total
	Genotype of interest		Number of pupae	Number of dead larvae	Total number of larvae tracked	S/Total
		Not taken into account in the pooled if
		Total number of larvae tracked <10 (for 20°C experiments) or <6 (for 28°C experiments)
	Control	Genotype	Number of pupae	Number of dead larvae	Total number of larvae tracked	S/Total
	Genotype of interest		Number of pupae	Number of dead larvae	Total number of larvae tracked	S/Total
Columns J-...	Pooled data
	Experiments	Control genotype	Genotype of interest
	Experiment number column A (1)	%S column G of Experiment 1	%S column G of Experiment 1
	Experiment number column A (2)	%S column G of Experiment 2	%S column G of Experiment 2
	Average (Avg)	Avg %S	Avg %S
	Standard Deviation (SD)	SD %S	SD %S
	Range (+)	Avg %S + SD %S	Avg %S + SD %S
	Range (-)	Avg %S - SD %S	Avg %S - SD %S
	If Range (-)< %S <Range (+)	Included in normalized data
	If %S < Range (-) or %S > Range (+)	Excluded of normalized data
	Normalized	Control genotype	Genotype of interest
	S	Total number of survivors (pupae)	Total number of survivors (pupae)
	D	Total number of dead larvae	Total number of dead larvae
	Total	Total number of larvae tracked	Total number of larvae tracked
	%S	S/Total	S/Total
	SD	Standard deviation	Standard deviation
	Nexp	Number of experiments (96 well-plates)	Number of experiments (96 well-plates)
	Median	Median	Median
	Avg	Average %S	Average of the %Ss

## Sheet: Fig S1A
			20˚C					24h 20˚C--> 28˚C					72h 20˚C--> 28˚C					96h 20˚C--> 28˚C					28˚C
		Experiments	dIlp2-Gal4/+	UAS-Kir2.1, tub80ts/+	dIlp2>>Kir2.1		Experiments	dIlp2-Gal4/+	UAS-Kir2.1, tub80ts/+	dIlp2>>Kir2.1		Experiments	dIlp2-Gal4/+	UAS-Kir2.1, tub80ts/+	dIlp2>>Kir2.1		Experiments	dIlp2-Gal4/+	UAS-Kir2.1, tub80ts/+	dIlp2>>Kir2.1		Experiments	dIlp2-Gal4/+	UAS-Kir2.1, tub80ts/+	dIlp2>>Kir2.1
		1		1	1		1		0.909091	0		1		1	0		1		1	0		1		0.769231	0
		2		0.636364			2	0.9	0.909091	0				1			2	1	0.95	0		2		0.833333	0
									1	0		2	1	0.95	0			1	0.833333	0		3
		3					3	1	1	0			1	0.956522	0		3	0.9	1	0		4		1	0.3125
								0.909091		0			0.958333	0.909091	0									0.846154	0
		4		1	1							3	0.954545				Avg	0.966667	0.945833	0
				0.869565	0.947368			0.936364	0.954545	0							SD	0.057735	0.0786165	0
					0.857143			0.0552978	0.0524864	0		Avg	0.97822	0.963123	0		Range (+)	1	1	0
								0.991661	1	0		SD	0.0251972	0.0382593	0		Range (-)	0.908932	0.867217	0		5	0.894737	1
								0.881066	0.902059	0		Range (+)	1	1	0							6	1
												Range (-)	0.953022	0.924863	0		Normalized	dIlp2-Gal4/+	UAS-Kir2.1, tub80ts/+	dIlp2>>Kir2.1		7	0.909091
		5						dIlp2-Gal4/+	UAS-Kir2.1, tub80ts/+	dIlp2>>Kir2.1							S	22	45	0		8
		6	1					19	48	0		Normalized	dIlp2-Gal4/+	UAS-Kir2.1, tub80ts/+	dIlp2>>Kir2.1		D	0	1	79
			1					2	3	60		S	72	58	0		Total	22	46	79		Avg	0.934609	0.889744	0.078125
								21	51	60		D	2	2	92		%S	1	0.978261	0		SD	0.057083	0.104784	0.15625
		7	1					0.904762	0.941176	0		Total	74	60	92		SD	0	0.0288675	0		Range (+)	0.991692	0.994527	0.234375
			1					0.00642824	0.0524864	0		%S	0.972973	0.966667	0		Nexp	2	3	4		Range (-)	0.877526	0.78496	0
			1					2	4	5		SD	0.0251972	0.0271159	0		Median	1	1	0
								0.904545	0.954545	0		Nexp	4	4	4		Avg	1	0.983333	0		Normalized	dIlp2-Gal4/+	UAS-Kir2.1, tub80ts/+	dIlp2>>Kir2.1
		8	1					0.904545	0.954545	0		Median	0.979167	0.978261	0							S	27	21	0
												Avg	0.97822	0.97663	0							D	3	4	37
																						Total	30	25	37
		9																				%S	0.9	0.84	0
		10																				SD	0.0101499	0.00906547	0
		11	0.954545																			Nexp	2	2	3
		12																				Median	0.901914	0.839744	0
		13																				Avg	0.901914	0.839744	0
		Avg	0.993506	0.876482	0.951128
		SD	0.0171802	0.171482	0.0673901
		Range (+)	1	1	1
		Range (-)	0.976326	0.705	0.883738
		Normalized	dIlp2-Gal4/+	UAS-Kir2.1, tub80ts/+	dIlp2>>Kir2.1
		S	127	60	51
		D	0	3	1
		Total	127	63	52
		%S	1	0.952381	0.980769
		SD	0	0.0753066	0.0303869
		Nexp	6	3	3
		Median	1	1	1
		Avg	1	0.956522	0.982456

## Sheet: Fig S1B
			20˚C					28˚C
		Experiments	dIlp2-Gal4/+	UAS-TRPA1/+	dIlp2>>TRPA1		Experiments	dIlp2-Gal4/+	UAS-TRPA1/+	dIlp2>>TRPA1
		1		0.777778	0.772727		1		0.142857
			1	0.652174	0.909091		2	0.0833333	0.105263	0
		2					3	0.214286	0.3	0
								0		0.117647
		3
							4	0	0.166667	0.117647
							5	0	0	0.0588235
		4						0.0833333
		5	0.857143
		6	0.833333
		7
		8
		9
		Avg	0.896825	0.714976	0.840909		Avg	0.0634921	0.142957	0.0588235
		SD	0.0901414	0.0888153	0.0964237		SD	0.0844036	0.108492	0.0588235
		Range (+)	0.986967	0.803791	0.937333		Range (+)	0.147896	0.25145	0.117647
		Range (-)	0.806684	0.626161	0.744485		Range (-)	0	0.0344652	0
		Normalized	dIlp2-Gal4/+	UAS-TRPA1/+	dIlp2>>TRPA1		Normalized	dIlp2-Gal4/+	UAS-TRPA1/+	dIlp2>>TRPA1
		S	28	29	27		S	2	4	5
		D	5	12	6		D	72	28	76
		Total	33	41	33		Total	74	32	81
		%S	0.848485	0.707317	0.818182		%S	0.027027	0.125	0.0617284
		SD	0.0168359	0.0888153	0.0964237		SD	0.0456435	0.0309586	0.0588235
		Nexp	2	2	2		Nexp	5	3	5
		Median	0.845238	0.714976	0.840909		Median	0	0.142857	0.0588235
		Avg	0.845238	0.714976	0.840909		Avg	0.0333333	0.138262	0.0588235

## Sheet: Fig S1D
		Experiments	FOXOmCherry	ΔdIlp7
		1
		2		0.954545
				1
				0.869565
				0.904762
		4
		5
		6		0.952381
		7		1
		8
		9		0.8
		10		0.357143
				0.571429
		11		1
		12		0.954545
		13		1
		14
		15	1	0.826087
		16
		17
		18		0.916667
		19
		20
		21		0.9
		22		1
		23		0.916667
		26	1
		27		0.952381
		28		1
		29		0.545455
		30		0.9
		31	1	1
				1
		32
		33
		35
		36		0.969697
		37
		38		0.875
				0.636364
		39		1
		40
		41	1
		42
		43		1
		44		0.954545
		45	1
		34	1
		46	1
		47
		48
		Avg	1	0.88818
		SD	0	0.161541
		Range (+)	1	1
		Range (-)	1	0.72664
		Normalized	FOXOmCherry	ΔdIlp7
		S	132	444
		D	0	24
		Total	132	468
		%S	1	0.948718
		SD	0	0.05925
		Nexp	7	25
		Median	1	0.954545
		Avg	1	0.945874

## Sheet: Fig S2A
		Experiments	FOXOmCherry	ΔdIlp5	ΔdIlp3,7	ΔdIlp5,7	ΔdIlp2-3,5
		1
		2		0.647059
		3
		4
		5
		6
		8
		9
		10
		11
		12
		13
		14
		15
		16
		17		0.136364
		18		0.363636
		19	0.581395	0.0833333
		20	0.548387
		21
		22	0.266667
		23		0.466667
		24		0.347826
		25	0.176471
		26	0.514286
		27					0.307692
							0.473684
		28	0.307692				0.25
		30		0.636364
		31				0.1	0.1
						0.25	0.434783
		32				0.277778	0.25
						0
		33				0.130435
		34			0.157895	0.272727
					0.421053	0.47619
					0.157895	0.428571
					0.142857
		35			0.105263	0.478261
		36
		37
		40	0.875
		41	0.692308
			0.769231
		Avg	0.525715	0.383036	0.196992	0.268218	0.302693
		SD	0.237015	0.221044	0.127088	0.170569	0.136637
		R+	0.76273	0.604079	0.32408	0.438787	0.43933
		R-	0.2887	0.161992	0.0699048	0.0976492	0.166056
		Normalized	FOXOmCherry	ΔdIlp5	ΔdIlp3,7	ΔdIlp5,7	ΔdIlp2-3,5
		S	109	23	11	29	22
		D	78	37	67	91	46
		Total	187	60	78	120	68
		%S	0.582888	0.383333	0.141026	0.241667	0.323529
		SD	0.14052	0.0645346	0.0248424	0.106152	0.0871292
		Nexp	5	3	4	5	4
		Median	0.548387	0.363636	0.150376	0.272727	0.278846
		Avg	0.528814	0.39271	0.140977	0.271902	0.310619

## Sheet: Fig S2B
		Experiments	FOXOmCherry	ΔdIlp2	ΔdIlp3	ΔdIlp5	ΔdIlp2-3	ΔdIlp2,7	ΔdIlp3,7	ΔdIlp5,7	ΔdIlp2-3,7	ΔdIlp2-3,5
		1
		2		1	0.833333	0.956522
				0.913043	1	0.954545
		4				1
						0.9
		5
		6		0.928571							0.9375
		7									0.8
		8
		9
		10
		11
		12			0.942857	1
		13			0.958333	0.958333
		14			1	1
					1
		15	1	1	1	1	0.952381
		16		1		0.909091	0.875
		17		1		1	1
		18		1	1		0.6875				0.846154
							0.75
		19					0.952381				1
		20		1
		21		1
		22
		23
		26	1
		27
		28		1						0.787234		0.6875
										0.75
		29		0.416667			0.785714			0.611111	0.647059	0.5
										0.434783
		30		1			1			0.944444	0.909091
		31	1		1	0.818182	0.818182	0.904762	0.857143	0.761905	1	0.473684
								0.956522	0.736842	0.954545
								0.954545	0.913043	0.869565
		32						1	0.875
		33						1	1			0.7
		35
		36
		37
		38		0.84375
		39		1
		40					1				0.833333	0.9
		41	1
		42		1	0.909091	1
		43
		44
		45	1								0.909091
		34	1					1	1
		46	1
		47									0.8	0.631579
		48										0.752941
		Avg	1	0.940135	0.964361	0.958056	0.882116	0.969305	0.897005	0.764198	0.868223	0.663672
		SD	0	0.152034	0.0561175	0.057131	0.115627	0.0384021	0.0991953	0.174237	0.106873	0.146981
		Range (+)	1	1	1	1	0.997742	1	0.9962	0.938436	0.975096	0.810653
		Range (-)	1	0.788102	0.908244	0.900925	0.766489	0.930903	0.797809	0.589961	0.76135	0.516691
		Normalized	FOXOmCherry	ΔdIlp2	ΔdIlp3	ΔdIlp5	ΔdIlp2-3	ΔdIlp2,7	ΔdIlp3,7	ΔdIlp5,7	ΔdIlp2-3,7	ΔdIlp2-3,5
		S	132	204	197	234	81	91	60	109	94	101
		D	0	8	8	6	10	2	8	43	15	39
		Total	132	212	205	240	91	93	68	152	109	140
		%S	1	0.962264	0.960976	0.975	0.89011	0.978495	0.882353	0.717105	0.862385	0.721429
		SD	0	0.0480436	0.0340342	0.0317113	0.0730464	0.0256854	0.0285513	0.0934562	0.056119	0.0498155
		Nexp	7	14	9	10	5	5	3	6	7	4
		Median	1	1	1	1	0.846591	0.978261	0.875	0.761905	0.846154	0.69375
		Avg	1	0.977526	0.97892	0.977849	0.857819	0.977767	0.881729	0.755963	0.862167	0.693005

## Sheet: Fig S2C
	Control (FOXOmCherry)	ΔdIlp3	ΔdIlp5	ΔdIlp3,7	ΔdIlp5,7	ΔdIlp2-3,7	ΔdIlp2-3,5
	2.35	2.44	2.33	3.21	2.15	1.82	1.42
	2.77	2.17	2.18	2.82	1.83	1.83	1.38
	2.79	2.11	2.34	2.88	2.46	1.62	1.45
	1.96	2.33	2.43	2.29	2.86	1.63	1.88
	1.7	2.05	2.62	2.15	2.56	1.08	1.86
	1.99	1.95	2.65	2.26	2.99	1.43	1.63
	2.73	2.12	2.32	2.41	2.33	1.54	2.07
	2.98	2.18	1.66	2.36	2.32	1.58	1.54
	1.89	2.26	2.56	2.3	2.87	1.23	2.08
	1.85	2.48	2.34	2	2.56	1.24	1.77
	1.73	2.1	2.04	2.35	2.53	1.41	2.25
	2.02	1.89	2.42	1.92	2.28	1.34
	2.08	2.01	1.97	2.65	2.33	1.77
	2.14	2.51	2.82	2.15	2.74	1.59
	2.76	2.51	2.85	2.55	2.42	1.33
	1.74	2.4	2.79	2.61	2.96	1.71
	2.04	1.9	2.6	2.27	2.29	1.33
	1.5	2.51	2.84	2.6	2.7	1.42
	2.06	2.61	1.79	2.05	2.17	1.64
	1.69	2.61	2.25	2.38	2.29	1.79
	1.99	1.73	2.1	1.99	2.04	2.01
	2.28	1.97	2.25	2.63	2.17	2.18
	1.76	2.23	1.83		2.75	1.72
	1.9	2.21	2.19		2.14	2.05
	2.59	2.38	2.02		2.67	2.44
	2.69	2.34	1.63		2.67	1.86
	3.1	2.02	2.47		2.6	1.95
	2.92	2.03	2.87		2.36	2.43
	3.89	1.91	2.11		2.61	1.51
	3.12	2.88	1.79		2.21	1.3
	3.12	1.97	2.62		2.59	1.05
	2.44	2.16	2.57		2.73	1.66
	3.37	2.47	2.24		2.75	1.27
	3.59	2.31	2.73		2.41	1.82
	3.21	2.52	2.36		2.47	1.9
	3.4	1.4	2.44		2.09	1.72
	3.23	2.69	2.51		2.22	1.75
	3.29	2.7	2.22		2.66	1.7
	2.59		2.61		1.88	2.25
	2.97		1.97		1.87	1.82
	3.41		2.12		2.11	2.09
	3.05		2.34		1.68	1.75
	2.59		2.15		2.22	1.8
	2.45		2.64		2.15	1.74
	2.81		2.44		2.24	1.76
	2.85		3.16		2.49
	2.14				2.2
	2.21				2.31
	1.9				2.06
	2.37				2.77
	2.01				2.04
	2.59				2.29
	2.44				2.76
	2.52				2.08
	3.14				2.55
	2.51				2.42
	2.86				2.26
	2.51				2.39
	2.76				2.79
	2.46				2.37
	2.7				2.17
	2.95				2.11
					2.6
					1.91
					2.71
					1.91
					2.65
Avg	2.53952	2.23842	2.35174	2.40136	2.38463	1.68578	1.75727
SD	0.544593	0.29932	0.339099	0.312909	0.297454	0.317108	0.283552
Npupae	62	38	46	22	67	45	11
Nplates	7	3	7	2	4	7	2
Median	2.555	2.22	2.34	2.355	2.36	1.72	1.77

## Sheet: Fig S3_WB adults AKT YF20
T in °C	AKT 84kDA	sample		dIlp2	dIlp3	dIlp5	dIlp7	dIlp2,7	dIlp3,7	dIlp2,3	dIlp5,7	dIlp2,3,7	foxo	lgr3	lgr4		T in °C	AKT 85kDA	sample		dIlp2	dIlp3	dIlp5	dIlp7	dIlp2,7	dIlp3,7	dIlp2,3	dIlp5,7	dIlp2,3,7	foxo	lgr3	lgr4		T in °C	AKT 85kDA	sample		dIlp2	dIlp3	dIlp5	dIlp7	dIlp2,7	dIlp3,7	dIlp2,3	dIlp5,7	dIlp2,3,7	foxo	lgr3	lgr4
20	AKT-Thr308			187.04	203.18		203.88			206.44	210.04	203.96	217.4	233.56	222.268		20	AKT-Thr308-2			143.584		159.252	170.695	144.922	153.047	143.647		112.98					20	AKT-Thr308-3			232.005	225.216	221.487	220.145			217.198	223.221	195.016	213.595	216.593	216.855
20	AKT-Ser505			233.319	232.784		238.099			231.871	226.022	236.704	231.364	236.562	233.384		20	AKT-Ser505-2			238.517		217.461	210.089	210.749	197.003	209.107		181.467					20	AKT-Ser505-3			186.095	185.743	197.218	200.429			204.555	206.422	201.567	223.044	229.802	234.029
20	panAKT			190.05	196.71		204.786			211.647	208.489	208.035	223.695	230.002	221.998		20	panAKT-2			218.185		219.275	221.098	208.118	216.548	215.588		205.187					20	panAKT-3			222.821	217.422	226.757	211.922			216.431	217	212.51	208.882	205.608	218.98
	Ratio 308			0.984162	1.03289		0.995576			0.975398	1.00744	0.980412	0.971859	1.01547	1.00122			Ratio 308			0.658084		0.726266	0.772033	0.696345	0.706758	0.666303		0.55062						Ratio 308			1.04122	1.03585	0.976759	1.0388			1.00354	1.02867	0.917679	1.02256	1.05343	0.990296
	activity in %			101.266	106.28		102.44			100.364	103.661	100.88	100	104.487	103.021			activity in %																	activity in %			101.824	101.299	95.5207	101.588			98.1401	100.597	89.743	100	103.018	96.8445
	Ratio 505			1.22767	1.18339		1.16267			1.09556	1.0841	1.13781	1.03428	1.02852	1.05129			Ratio 505			1.09319		0.991727	0.950208	1.01264	0.909743	0.969938		0.884398						Ratio 505			0.835177	0.854297	0.869733	0.945768			0.945128	0.951253	0.948506	1.0678	1.11767	1.06872
	activity in %			118.698	114.416		112.413			105.924	104.816	110.009	100	99.4429	101.644			activity in %																	activity in %			78.2148	80.0054	81.451	88.5717			88.5118	89.0854	88.8281	100	104.67	100.087
	panAKT			0.849594	0.879367		0.91547			0.946141	0.932024	0.929994	1	1.02819	0.992414																				panAKT			0.996093	0.971957	1.01369	0.94737			0.967527	0.970071	0.949999	1	0.919144	0.978922
	AKT308-CC			220.152	231.053		222.705			218.192	225.359	219.313	217.4	227.155	223.967																				AKT308-CC			232.915	231.714	218.496	232.375			224.488	230.108	205.28	213.595	235.646	221.524
	AKT308-%			98.7499	94.0911		97.6178			99.6372	96.4682	99.1276	100	95.7054	97.0678																				AKT308-%			91.7051	92.1805	97.7569	91.9183			95.1477	92.8238	104.05	100	90.6422	96.4206
	AKT505-CC			198.226	204.703		217.972			219.383	210.658	220.133	231.364	243.232	231.613																				AKT505-CC			185.368	180.534	199.918	189.88			197.913	200.244	191.488	223.044	211.221	229.096
	AKT505-%			116.717	113.024		106.144			105.461	109.829	105.102	100	95.1208	99.8923																				AKT505-%			120.325	123.547	111.568	117.465			112.698	111.386	116.479	100	105.597	97.3582
T20 - AKT-Thr308					T20 - AKT-Ser505				T20 - panAKT				T20 - AKT-Thr308-2					T20 - AKT-Ser505-2				T20 - panAKT-2				T20 - AKT-Thr308-3					T20 - AKT-Ser505-3				T20 - panAKT-3
pixelintensity	mean	max	min		mean	max	min		mean	max	min		pixelintensity	mean	max	min		mean	max	min		mean	max	min		pixelintensity	mean	max	min		mean	max	min		mean	max	min
dIlp2	187040	185	191		233319	228040	238		190050	186200	197		dIlp2	143584	132200	167		238517	236120	241		218185	213375	222146		dIlp2	232005	229	235		186095	182840	193		222821	221	226
dIlp3	203180	189	210		232784	229000	235400		196710	188800	201		dIlp5	159252	146760	178280		217461	214100	221900		219275	216200	221000		dIlp3	225216	222680	227340		185743	179280	195		217422	212490	223408
dIlp7	203880	193	217		238099	235000	240000		204786	202000	212		dIlp7	170695	167660	177000		210089	203000	215000		221098	219000	225000		dIlp5	221487	219000	225000		197218	195020	199		226757	217960	233880
dIlp2,3	206440	199	213		231871	230000	234580		211647	205000	217		dIlp2,7	144922	115000	159000		210749	198120	215360		208118	200000	217000		dIlp7	220145	215880	225000		200429	199000	203		211922	197000	223000
dIlp5,7	210040	197	216		226022	224840	227000		209489	203480	214240		dIlp3,7	153047	135000	163800		197003	190760	201540		216548	209000	221000		dIlp2,3	217198	209000	223880		204555	201580	207060		216431	211000	222000
dIlp2,3,7	203960	195	210		236704	234180	238620		208035	198000	213800		dIlp5,7	112980	95000	145000		181467	176380	189080		205187	202300	208020		dIlp5,7	223221	220240	227000		206422	205000	208000		217000	211000	219000
foxo	217400	214	220		231364	229000	233000		223695	220000	226920		dIlp2,3,7	143647	131000	157000		209107	199000	215640		215588	212000	219000		dIlp2,3,7	195016	189000	203000		201567	198440	204640		212510	211000	215000
lgr3	233560	221	225		236562	234880	241000		230002	225000	233000		dIlp2,3													foxo	213595	208760	215640		223044	223000	223320		208882	205000	215000
lgr4	222268	216160	229360		233384	231018	235800		221988	219000	225000		foxo													lgr3	216593	195000	211060		229802	227000	232160		205608	200000	210000
													lgr3													lgr4	216855	212000	220600		234029	227000	239000		218980	213000	227000
													lgr4
Summary 20
T in °C	AKT 85kDA	sample		dIlp2	dIlp3	dIlp5	dIlp7	dIlp2,7	dIlp3,7	dIlp2,3	dIlp5,7	dIlp2,3,7	foxo	lgr3	lgr4
20	AKT308-%			95.2275	93.1358	97.7569	94.768			97.3925	94.646	101.589	100	93.1738	96.7442
20	AKT505-%			118.521	118.286	111.568	111.805			109.08	110.608	110.79	100	100.359	98.6253
	R(308/505)			0.803465	0.787381	0.876209	0.847622			0.892855	0.855691	0.916948	1	0.928404	0.980927
	n-w			2	2	1	2	0	0	2	2	2	2	2	2
	1	YF
	1	51	193182	181	201	7970	50488			YF
	2	51	177076	170960	184	4574	50160		T in °C	AKT 85kDA	sample		dIlp2	dIlp3	dIlp5	dIlp7	dIlp2,7	dIlp3,7	dIlp2,3	dIlp5,7	dIlp2,3,7	foxo	lgr3	lgr4
	3	51	183176	181000	186	180000	50000		20	AKT-Thr308			193182	177076	183176	173216	179745	174275	161059	206529		177163	218647
308	4	51	173216	164000	181	0.000	50000		20	AKT-Ser505			150700	164216	183847	192184	180034	175478	211483	186562		173225	182618
	5	51	161059	152000	167	0.000	50000		20	panAKT			198511	199695	201098	203255	202451	194510	195667	209490		192417	205137
	6	51	179745	174000	185	0.000	50000
	7	51	174275	167000	179	0.000	50000			Ratio 308			0.973155	0.886732	0.910879	0.85221	0.887844	0.895969	0.823128	0.985866		0.920724	1.06586
	8	51	206529	205000	209	0.000	50000			activity in %			100	91.1193	93.6006	87.5719	91.2336	92.0685	84.5834	101.306		94.6123	109.526
	9	51	218647	202000	216	0.000	50000			Ratio 505			0.759152	0.822334	0.914216	0.945531	0.889272	0.902154	1.08083	0.890553		0.900258	0.890225
	10	51	177163	173120	184	-6843	50359			activity in %			100	108.323	120.426	124.551	117.14	118.837	142.374	117.309		118.587	117.266
	11	51	150700	117000	168800	5711	50249
	12	51	164216	159000	171000	5711	50249			panAKT			1.03167	1.03782	1.04512	1.05633	1.05215	1.01088	1.01689	1.08873		1	1.06611
	13	51	183847	181000	187000	5711	50249			AKT308-CC			187252	170622	175269	163980	170836	172400	158384	189697		177163	205089
505	14	51	192184	180120	198740	3434	50090			AKT308-%			94.6123	103.833	101.081	108.04	103.703	102.763	111.857	93.3925		100	86.3834
	15	51	211483	201000	215520	-1146	50010			AKT505-CC			155473	170427	192141	203009	189422	177387	215055	203115		173225	194690
	16	51	180034	208800	217180	-1146	50010			AKT505-%			111.418	101.642	90.155	85.3288	91.4491	97.6539	80.5491	85.284		100	88.9747
	17	51	175478	210160	217700	-1146	50010
	18	51	186562	180920	191000	-1146	50010
	19	51	182618	171000	187000	-1146	50010
	20	26	173225	155	181880	-2291	25020
	21	51	198511	173000	211000	3434	50090
	22	51	199695	194420	204240	3434	50090
	23	51	201098	198180	203940	3434	50090
pan	24	51	203255	195000	209000	0.000	50000
	25	51	195667	187000	202000	0.000	50000
	26	51	202451	196000	206000	0.000	50000
	27	51	194510	190000	199000	0.000	50000
	28	51	209490	207000	212000	0.000	50000
	29	51	205137	196000	213000	0.000	50000
	30	51	192417	186200	205000	-4574	25080
